# Supplementary material for: Modelling the Distribution of the Red Macroalgae Asparagopsis to Support Sustainable Aquaculture Development
Source: MDPI journal article supplement (doi:10.3390/agriengineering3020017), 2021-05-12
Supplement: s1 [file s1]

Archive with 4 entries (4 files):
- Supplementary Information/SI1.pdf
- Supplementary Information/SI2.zip
- Supplementary Information/SI3.pdf
- Supplementary Information/SI4.pdf
