# Supplementary material for: Modelling the Distribution of the Red Macroalgae Asparagopsis to Support Sustainable Aquaculture Development
Source: MDPI journal article supplement (doi:10.3390/agriengineering3020017), 2021-05-12
Supplement: s1 [file s1 › Supplementary Information/SI1.pdf]

## **Supplementary Information 1**

### Information & Results of initial Principle Components Analysis

| <b>dataset_code</b> | <b>layer_name</b>                                |
|---------------------|--------------------------------------------------|
| 71 Bio-ORACLE       | BO_chlomean                                      |
| 73 Bio-ORACLE       | BO_chlorange                                     |
| 78 Bio-ORACLE       | BO_damean                                        |
| 80 Bio-ORACLE       | BO_dissox                                        |
| 81 Bio-ORACLE       | BO_nitrate                                       |
| 84 Bio-ORACLE       | BO_ph                                            |
| 85 Bio-ORACLE       | BO_phosphate                                     |
| 86 Bio-ORACLE       | BO_salinity                                      |
| 88 Bio-ORACLE       | BO_sstmax                                        |
| 91 Bio-ORACLE       | BO_sstrange                                      |
| 95 MARSPEC          | MS_bathy_5m                                      |
| 96 MARSPEC          | MS_biogeo01_aspect_EW_5m                         |
| 97 MARSPEC          | MS_biogeo02_aspect_NS_5m                         |
| 98 MARSPEC          | MS_biogeo03_plan_curvature_5m                    |
| 99 MARSPEC          | MS_biogeo04_profile_curvature_5m                 |
| 100 MARSPEC         | MS_biogeo05_dist_shore_5m                        |
| 101 MARSPEC         | MS_biogeo06_bathy_slope_5m                       |
| 103 MARSPEC         | MS_biogeo08_sss_mean_5m                          |
| 105 MARSPEC         | MS_biogeo10_sss_max_5m                           |
| 108 MARSPEC         | MS_biogeo13_sst_mean_5m                          |
| 71                  | Chlorophyll A (mean)                             |
| 73                  | Chlorophyll A (range)                            |
| 78                  | Diffuse attenuation coefficient at 490 nm (mean) |
| 80                  | Dissolved oxygen                                 |
| 81                  | Nitrate                                          |
| 84                  | pH                                               |
| 85                  | Phosphate                                        |
| 86                  | Salinity                                         |
| 88                  | Sea surface temperature (maximum)                |
| 91                  | Sea surface temperature (range)                  |
| 95                  | Bathymetry                                       |
| 96                  | East/West aspect                                 |
| 97                  | North/South Aspect                               |
| 98                  | Plan curvature                                   |
| 99                  | Profile curvature                                |
| 100                 | Distance to shore                                |
| 101                 | Bathymetric slope                                |
| 103                 | Sea surface salinity (annual mean)               |
| 105                 | Sea surface salinity (monthly maximum)           |
| 108                 | Sea surface temperature (annual mean)            |

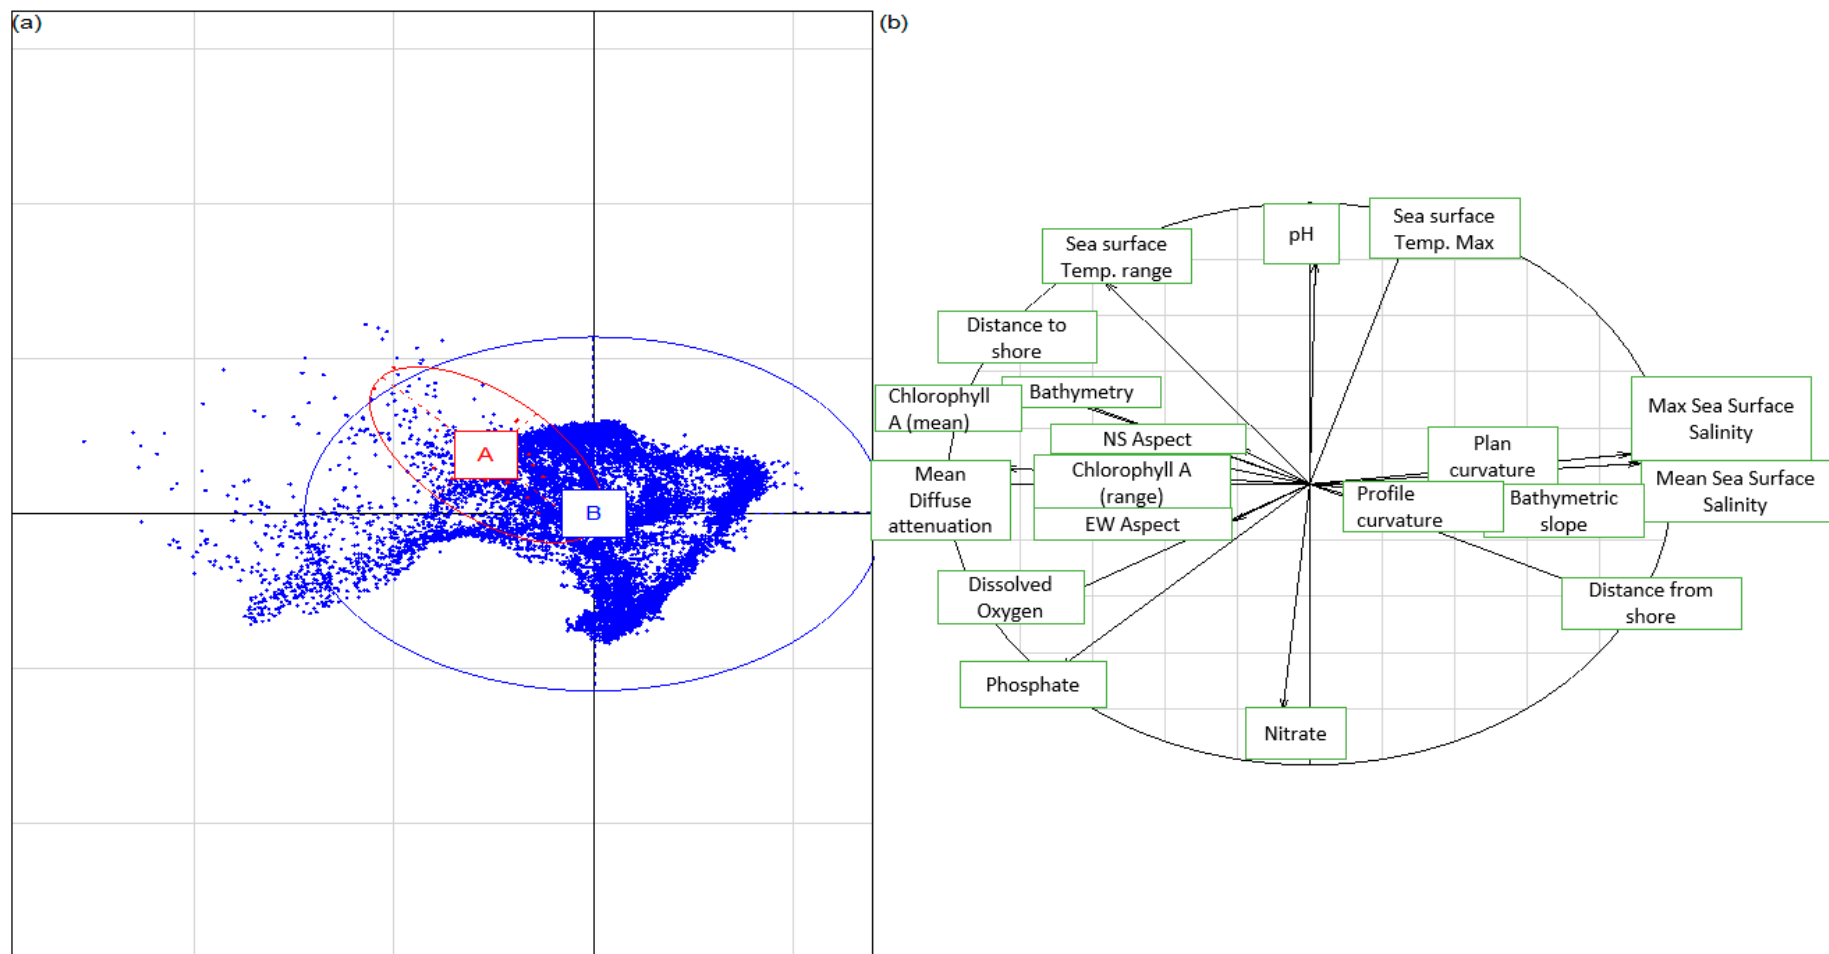

Figure SI1 – Results of the principle components analysis for all variables with a) illustrating the distribution of *Asparagopsis* variables in environmental space and b) correlation circle of the selected environmental variables as a function of the same first two axes.
